# Supplementary material
Source: PubMed Central journal article supplement (PMC3102601)
Supplement: NIHMS287955-supplement-1_si_001.pdf [file NIHMS287955-supplement-1_si_001.pdf]

Supporting Information

**Divergence of Chemical Function in the Alkaline Phosphatase Superfamily:  
Structure and Mechanism of the P-C Bond Cleaving Enzyme  
Phosphonoacetate Hydrolase<sup>+</sup>**

Alexander Kim<sup>1</sup>, Matthew M. Benning<sup>2</sup>, Sang OkLee<sup>1</sup>, John Quinn<sup>3</sup>, Brian M. Martin<sup>4</sup>, Hazel M. Holden<sup>2\*</sup> and Debra Dunaway-Mariano<sup>1\*</sup>

<sup>1</sup>*Department of Chemistry and Chemical Biology, University of New Mexico, Albuquerque, New Mexico 87131,* <sup>2</sup>*Department of Biochemistry, University of Wisconsin, 433 Babcock Dr., Madison, Wisconsin 53706-1544;* <sup>3</sup>*School of Biology and Biochemistry and Questor Centre, The Queen's University of Belfast, Medical Biology Centre, 97, Lisburn Road, BT9 7BL Belfast, Northern Ireland;* <sup>4</sup>*Molecular Structure Unit, Laboratory of Neurotoxicology, NIMH Building 10, Room 3N309, 10 Center Drive, MSC 1262 Bethesda, MD 20892-1262*

Debra Dunaway-Mariano

TEL 505-277-3383, FAX 505-277-6202,  
E-mail: dd39@unm.edu

**Contents:** Eleven pages total, which contain the multiple alignment of phosphonoacetate hydrolase amino acid sequences (Figure SI1).

**Figure SI1.** The amino acid sequence alignment of PAc hydrolase orthologs which possess 45 % sequence identity or greater in pairwise matches. The alignment was generated in ClustalW (<http://www.ch.embnet.org/software/ClustalW.html>)







tr|C5AM01|C5AM01\_BURGB -MNQTIIEVNGRHYRLPSARTAIVCLSGGSP---DYLEAAVADGAAPFMAR  
tr|B3QHC0|B3QHC0\_RHOPT TTQPLIEANGRSYAVPQRPVVVICLDGDFP---EYLARGIADGVLRTIGA  
tr|Q0CWK4|Q0CWK4\_ASPTN --MTSIELHGRTYRLPRHPTVVVVCVDGDFP---EYLQAGCEDGILPLTSS  
tr|C1DSK8|C1DSK8\_AZOVD -MNRFSVNGNRYRWPBRPVVVVICIDGGDP---EYLRRLFADGALPNQR  
tr|B8MDJ2|B8MDJ2\_TALSN ESRTQFTLHSRQYNLP IQPTVVVICIDGDFP---EYLES---GILPTFNH  
tr|Q01YC7|Q01YC7\_SOLUE AAEKRITVNGKKYDWPKSPVVVILIDGGDP---AYVNAALAQGLLPNFKK

. . \* . . . \* : \*

tr|Q51782|Q51782\_PSEFL LTGFG-TVLTGDCVVPSTFNPNNLSIVTGAPPSVHIGICGNFFFDQETQ--  
tr|Q50HR5|Q50HR5\_9PSED LTGFG-TVLTGDCVVPSTFNPNNLSIVTGAPPSVHIGICGNFFFDQETQ--  
tr|Q50HR6|Q50HR6\_PSEPU LTDFG-TVLTGDCVVPSTFNPNNLSIVTGAPPSVHIGICGNFFFDQETQ--  
tr|B1GB52|B1GB52\_9BURK LRSFG-TVLTGDCVVPSTFNPNNLSIVTGAPPSVHIGICGNFFFDDEETQ--  
tr|B3R8G0|B3R8G0\_CUPTR LAKRG-TVLTGDCVVPSTFNPNNLSIVTGVPSSVHIGICGNFFFDTEAG--  
tr|Q0K2Z6|Q0K2Z6\_RALEH LAKRG-TVLTGDCVVPSTFNPNNLSIVTGVPSSVHIGICGNFFFDTEAG--  
tr|Q122G7|Q122G7\_POLSJ TLALG-SGLMADCVVPSTFNPNNLSIVTGAPPSVHIGICGNYLFDTATG--  
tr|A1GW5|A1GW5\_VEREI MLEDG-SRFIADSVVPTFNPNNLSIVTGVPSSVHIGICGNFFFDPASG--  
tr|Q46NR5|Q46NR5\_RALEJ VMQHG-TSLLGDCVVPSTFNPNNLSIVTGAPPSVHIGICGNFFFDRELG--  
tr|B1FA18|B1FA18\_9BURK LLKPG-TALKGECVVPSTFNPNNLSIVTGVPPIAHGICGNFFYDRDTG--  
tr|Q13P91|Q13P91\_BURXL MLKGG-SAFKGDVVPSTFNPNNLSIVCGVPPSVHIGICGNFFWDPHANGG  
tr|B9BDA8|B9BDA8\_9BURK LLKPG-TALKGECVVPSTFNPNNLSIVTGVPSSVHIGICGNFFYDRDTG--  
tr|Q39BS9|Q39BS9\_BURS3 LLKPG-TALKGECVVPSTFNPNNLSIVTGVPSSVHIGICGNFFYDRDTG--  
tr|B1K0L1|B1K0L1\_BURCC LLKPG-TALKGECVVPSTFNPNNLSIVTGVPPIAHGICGNFFYDRDTG--  
tr|B1GBC6|B1GBC6\_9BURK MLKGG-AAFKGDVVPSTFNPNNLSIVCGVPPSVHIGICGNFFWDPDANDG  
tr|Q0JZU4|Q0JZU4\_RALEH LLEAG-SAFRGACVVPSTFNPNNLSIVCGAPPVHIGICGNFFYDRSANGG  
tr|B2JLS9|B2JLS9\_BURP8 MLNGG-AAFKGDVVPSTFNPNNLSIVCGVPPSVHIGICGNFFWDPQANDG  
tr|B2TDW9|B2TDW9\_BURPP MLKGG-AAFKGDVVPSTFNPNNLSIVCGVPPSVHIGICGNFFWDPDANGG  
tr|A9AC80|A9AC80\_BURM1 LLKPG-TALKGECVVPSTFNPNNLSIVTGVPSSVHIGICGNFFYDRDTG--  
tr|B3RBG9|B3RBG9\_CUPTR LLDAG-SAFRGACVVPSTFNPNNLSIVCGAPPVHIGICGNFFYDRSANGG  
tr|Q2T3L1|Q2T3L1\_BURTA MLREG-SAFDADCVVPSTFNPNNLSIVCGAPPVHIGICGNFFWDPDAQRG  
tr|Q63NF1|Q63NF1\_BURPS MLREG-SAFEADCVVPSTFNPNNLSIVCGAPPVHIGICGNFFWDPQNAQGG  
tr|Q62CM0|Q62CM0\_BURMA MLREG-SAFEADCVVPSTFNPNNLSIVCGAPPVHIGICGNFFWDPQNAQGG  
tr|A4JJS8|A4JJS8\_BURVG MIAEG-TAWRADSVVPTFNPNNLSIVCGVPPSVHIGICGNFFWDPDADGG  
tr|B9BUA1|B9BUA1\_9BURK MIAEG-SAWRADCVVPSTFNPNNLSIVCGVPPSVHIGICGNFFWDPDADGG  
tr|Q92UV8|Q92UV8\_RHIME IKERG-AVRLAHSVVPSTFNPNNLSIATGSPPAVHIGICGNFFYDRDTG--  
tr|A6UJ29|A6UJ29\_SINMW IKERG-AVRLAHSVVPSTFNPNNLSIATGTPPAVHIGICGNFFYDRDTG--  
tr|C8SFV8|C8SFV8\_9RHIZ IKEKG-TVRFADSVVPSTFNPNNLSIATGRPPSVHIGICGNFFYDRSANGG  
tr|B6B654|B6B654\_9RHOB IRETG-TDRLAHSVVPSTFNPNNLSIATGRPPAVHIGICGNFFYDRDTG--  
tr|Q7WNM7|Q7WNM7\_BORBR FFEEG-FGAVADCVVPSTFNPNNLSIVTGAPPVHIGICGNFFYDRDTG--  
tr|C7D6N1|C7D6N1\_9RHOB MRETG-TDRLAHSVVPSTFNPNNLSIATGRPPSVHIGICGNFFYDRDTG--  
tr|A3SHW2|A3SHW2\_9RHOB MRETG-TNRLAHSVVPSTFNPNNLSIATGQPPKVVHIGICGNFFYDRDTG--  
tr|B1PM60|B1PM60\_9PROT MRETG-TNRLAHSVVPSTFNPNNLSIATGRPPVHIGICGNFFYDRDTG--  
tr|D0RQ73|D0RQ73\_9RICK MISKS-TYEIGKCAMPSTFNPNNLSIVTGTPDVHIGICGNFFYDRDTG--  
tr|B1A0M6|B1A0M6\_9BACT MRETG-TDRLAHSVVPSTFNPNNLSIATGRPPVHIGICGNFFYDRDTG--  
tr|B6JE67|B6JE67\_OLICO VISQG-FYIADAAMPSTFNPNNLSIVAGAPPVHIGICGNFFYDRDTG--  
tr|B9K3S9|B9K3S9\_AGRVS FLNDG-FYAIADAAMPSTFNPNNLSIVCGAPPVHIGICGNFFYDRDTG--  
tr|Q215P4|Q215P4\_RHOPB FKSGG-YIGTALATVPTTNTNNTSIVTGVPSSVHIGICGNFFYDRDTG--  
tr|A9G6L6|A9G6L6\_SORC5 TLAAGGLYVRGRGQIPSTFNPNNLSIVTGQPARVHIGICGNFFYDRDTG--  
tr|C5AM01|C5AM01\_BURGB MMRDG-AALDAGSVIPSTLTHANQLSIACGAPPALHIGICGNFFYDRDTG--  
tr|B3QHC0|B3QHC0\_RHOPT LRATG-YVGTALATVPTTNTNNTSIVTGAPPVHIGICGNFFYDRDTG--  
tr|Q0CWK4|Q0CWK4\_ASPTN FIQTG-FHRTANCAMPSTLNPNNLSIITGVPTKVHIGICGNFFYDRDTG--  
tr|C1DSK8|C1DSK8\_AZOVD FVQEG-YSAVATGSMPSFTCPNNLSIITGVPTARHIGICGNFFYDRDTG--  
tr|B8MDJ2|B8MDJ2\_TALSN FVENG-FHATAKSCMPSTFNPNNLSIITGAPPSIG-IAGNFYLDRETG--  
tr|Q01YC7|Q01YC7\_SOLUE IMTEG-FVSIAGAMPSTFNPNNLSIITGVPPSVHIGICGNFFYDRDTG--

. . :\*: \* \*: \* : \* .. : \*\* :

tr|Q51782|Q51782\_PSEFL --EEVLMNDAKYLRAPTILAEMAKAGQLVAVVTAKDKLRNLLGHQLKG--  
tr|Q50HR5|Q50HR5\_9PSED --EEVLMNDAKYLRAPTILAEMAKAGQLVAVVTAKDKLRNLLGHQLKG--  
tr|Q50HR6|Q50HR6\_PSEPU --EEVLMNDAKYLRAPTILAEMAKAGQLVAVVTAKDKLRNLLGHQLKG--  
tr|B1GB52|B1GB52\_9BURK --TEVLMNDAKYLRAPTILAEMARAGQVAVVTAKDKLRNLLGHQLKG--  
tr|B3R8G0|B3R8G0\_CUPTR --AEVLMNDARYLRAPTVLA AAAAQAGAKVAVVTAKDKLRNLLGHQLKG--  
tr|Q0K2Z6|Q0K2Z6\_RALEH --AEVLMNDARYLRAPTVLA AAAAQAGASVAVVTAKDKLRNLLGHQLKG--  
tr|Q122G7|Q122G7\_POLSJ --TEVMMNDPKYLRAPTL LAALADAGQSLVVVTAKDKLRNLLGHQLKG--  
tr|A1GW5|A1GW5\_VEREI --EEVMMNDPKYLRAPTL LAALADAGAKVAVVTAKDKLRNLLGHQLKG--  
tr|Q46NR5|Q46NR5\_RALEJ --AEVMMNDPKYLRAPTVLA AAFANAGAKVAVVTAKDKLRNLLGHQLKG--  
tr|B1FA18|B1FA18\_9BURK --AEVLMNDPKYLRAPTVLA TFAERGARVAVVTAKDKLRNLLGHQLKG--  
tr|Q13P91|Q13P91\_BURXL EGAEVMMNDPAYLRAGTLLAAAAEAGAAVAVVTAKDKLRNLLGHQLKG--  
tr|B9BDA8|B9BDA8\_9BURK --AEVLMNDPKYLRAPTVLA TFAEQGARVAVVTAKDKLRNLLGHQLKG--  
tr|Q39BS9|Q39BS9\_BURS3 --AEVLMNDPKYLRAPTVLA TFAEQGARVAVVTAKDKLRNLLGHQLKG--  
tr|B1K0L1|B1K0L1\_BURCC --AEVLMNDPKYLRAPTVLA TFAEQGARVAVVTAKDKLRNLLGHQLKG--  
tr|B1GBC6|B1GBC6\_9BURK AGAEVMMNDPAYLRVGTLLAAAAEAGAAVAVVTAKDKLRNLLGHQLKG--  
tr|Q0JZU4|Q0JZU4\_RALEH RGEVMMNDPKYLRAPTL LAALADAGASVAVVTAKDKLRNLLGHQLKG--  
tr|B2JLS9|B2JLS9\_BURP8 KGAEVMMNDPAYLRAGTLLAAAAEAGAAVAVVTAKDKLRNLLGHQLKG--  
tr|B2TDW9|B2TDW9\_BURPP EGAEVMMNDPAYLRAGTLLAAAAEAGAAVAVVTAKDKLRNLLGHQLKG--  
tr|A9AC80|A9AC80\_BURM1 --AEVLMNDPKYLRAPTVLA TFAEQGARVAVVTAKDKLRNLLGHQLKG--  
tr|B3RBG9|B3RBG9\_CUPTR RGEVMMNDPKYLRAPTL LAALADAGASVAVVTAKDKLRNLLGHQLKG--  
tr|Q2T3L1|Q2T3L1\_BURTA AGAEVMMNDPAYLRAGTLLAAAAEAGAAVAVVTAKDKLRNLLGHQLKG--



tr|B1GB52|B1GB52\_9BURK  
tr|B3R8G0|B3R8G0\_CUPTR  
tr|Q0K2Z6|Q0K2Z6\_RALEH  
tr|Q122G7|Q122G7\_POLSJ  
tr|A1GW5|A1GW5\_VEREI  
tr|Q46NR5|Q46NR5\_RALEJ  
tr|B1FA18|B1FA18\_9BURK  
tr|Q13P91|Q13P91\_BURXL  
tr|B9BDA8|B9BDA8\_9BURK  
tr|Q39BS9|Q39BS9\_BURS3  
tr|B1K0L1|B1K0L1\_BURCC  
tr|B1GBC6|B1GBC6\_9BURK  
tr|Q0JZU4|Q0JZU4\_RALEH  
tr|B2JLS9|B2JLS9\_BURP8  
tr|B2TDW9|B2TDW9\_BURPP  
tr|A9AC80|A9AC80\_BURM1  
tr|B3RBG9|B3RBG9\_CUPTR  
tr|Q2T3L1|Q2T3L1\_BURTA  
tr|Q63NF1|Q63NF1\_BURPS  
tr|Q62CM0|Q62CM0\_BURMA  
tr|A4JJS8|A4JJS8\_BURVG  
tr|B9BUA1|B9BUA1\_9BURK  
tr|Q92UV8|Q92UV8\_RHIME  
tr|A6UJ29|A6UJ29\_SINMW  
tr|C8SFV8|C8SFV8\_9RHIZ  
tr|B6B654|B6B654\_9RHOB  
tr|Q7WNM7|Q7WNM7\_BORBR  
tr|C7D6N1|C7D6N1\_9RHOB  
tr|A3SHW2|A3SHW2\_9RHOB  
tr|B1PM60|B1PM60\_9PROT  
tr|D0RQ73|D0RQ73\_9RICK  
tr|B1A0M6|B1A0M6\_9BACT  
tr|B6JE67|B6JE67\_OLICO  
tr|B9K3S9|B9K3S9\_AGRVS  
tr|Q215P4|Q215P4\_RHOPB  
tr|A9G6L6|A9G6L6\_SORC5  
tr|C5AM01|C5AM01\_BURGB  
tr|B3QHC0|B3QHC0\_RHOPT  
tr|Q0CWK4|Q0CWK4\_ASPTN  
tr|C1DSK8|C1DSK8\_AZOV  
tr|B8MDJ2|B8MDJ2\_TALSN  
tr|Q01YC7|Q01YC7\_SOLUE

tr|Q51782|Q51782\_PSEFL  
tr|Q50HR5|Q50HR5\_9PSED  
tr|Q50HR6|Q50HR6\_PSEPU  
tr|B1GB52|B1GB52\_9BURK  
tr|B3R8G0|B3R8G0\_CUPTR  
tr|Q0K2Z6|Q0K2Z6\_RALEH  
tr|Q122G7|Q122G7\_POLSJ  
tr|A1GW5|A1GW5\_VEREI  
tr|Q46NR5|Q46NR5\_RALEJ  
tr|B1FA18|B1FA18\_9BURK  
tr|Q13P91|Q13P91\_BURXL  
tr|B9BDA8|B9BDA8\_9BURK  
tr|Q39BS9|Q39BS9\_BURS3  
tr|B1K0L1|B1K0L1\_BURCC  
tr|B1GBC6|B1GBC6\_9BURK  
tr|Q0JZU4|Q0JZU4\_RALEH  
tr|B2JLS9|B2JLS9\_BURP8  
tr|B2TDW9|B2TDW9\_BURPP  
tr|A9AC80|A9AC80\_BURM1  
tr|B3RBG9|B3RBG9\_CUPTR  
tr|Q2T3L1|Q2T3L1\_BURTA  
tr|Q63NF1|Q63NF1\_BURPS  
tr|Q62CM0|Q62CM0\_BURMA  
tr|A4JJS8|A4JJS8\_BURVG  
tr|B9BUA1|B9BUA1\_9BURK  
tr|Q92UV8|Q92UV8\_RHIME  
tr|A6UJ29|A6UJ29\_SINMW  
tr|C8SFV8|C8SFV8\_9RHIZ  
tr|B6B654|B6B654\_9RHOB  
tr|Q7WNM7|Q7WNM7\_BORBR  
tr|C7D6N1|C7D6N1\_9RHOB  
tr|A3SHW2|A3SHW2\_9RHOB

LLREERPDLMYLSTTDYVQHKHAPGTSEANAFYAMDDYLLRLHAEGAVL  
LLETERPDLMYLSTTDYIQHKHAPGTAGANAFYAMDSYLQRLDALGAVI  
LLETVRPDLMYLSTTDYIQHKHAPGTPQANAFYAMIDSYLQRLDALGAVI  
IMQKYHPDVMYLSTTDYVQHKHAPGTDGANAFYRMMDGYLAKLDALGCVI  
LMQRHRPDLMYLSTTDYVQHKHAPGTPDANAFYQMMDGYLRQLDAMGAVI  
LMERERPDLMYLSTTDYVQHKHAPGSPAANAFYQMMDGYLSQLDALGATI  
LLETTRPDLMYLSTTDYVQHKCAPGTDGANAFYQMMDGYLKRLEDELGAIV  
LAQTRKLDLMYLSTTDYIQHKFAPGTEGANAFYAMMDGYLAKLDALGCVI  
LLETTRPDLMYLSTTDYVQHKCAPGTPGANAFYQMMDAYLKRLEDELGAIV  
LLETTRPDLMYLSTTDYVQHKCAPGTEGANAFYAMMDKYLQRLDELGAIV  
LLETTRPDLMYLSTTDYVQHKCAPGTPGANAFYAMMDTYLQRLDALGAVI  
LAQTRTLDLMYLSTTDYIQHKFAPGTEGANAFYAMMDGYLAKLDALGCVI  
LMETRRPDLMYLSTTDYIQHKFAPGSDGANAFYAMMDKYLARLDELGCVV  
LAQTRKLDLMYLSTTDYIQHKWAPGTEGANAFYAMMDGYLSKLDALGCVI  
LAQTRKLDLMYLSTTDYIQHKWAPGTEGANAFYAMMDGYLAKLDALGCVI  
LLETTRPDLMYLSTTDYVQHKCAPGTPGANAFYQMMDAYLKRLEDELGAIV  
LMETRRPDLMYLSTTDYIQHKFAPGSDGANAFYAMMDKYLARLDELGCVV  
LAQNRADLMYLSTTDYVQHKCAPGSDGANAFYAMMDRYLAALDALGCVI  
LAQSRADLMYLSTTDYVQHKCAPGSEGANAFYAMMDRYLAALDALGCVI  
LAQSRADLMYLSTTDYVQHKCAPGSEGANAFYAMMDRYLAALDALGCVI  
LAQTRQVDMYLSTTDYVQHKCEPGSAGANAFYAMMDRYLAQLDALGVAI  
LAQTRQIDLMYLSTTDYVQHKCAPGSGANAFYAMTDYLAQLDALGVAI  
LLREFRPDIMYLSTTDYVQHKYAPGVEANSFYEMFDYLAELDGLGAAI  
LLKEFHDPIMYLSTTDYVQHKYAPGVAEANAFYAMFDYLAELDGLGAAI  
LLREFRPDIMYLSTTDYVQHKYAPGVPQANAFYEMFDKYLTELDELGAAI  
LLQEFRPDVMYLSTTDYIQHKFAPDQGGALDFYAMFDYLAQLDETGAII  
LLRQGRARLLYLSLSDYIQHKHAPGEPESDAFLRAIDTRLQAFVDAGAVV  
LLKEWSPDVMYLSTTDYVQHKYAPDQAQAKSFYEMFDKYLTELDMGAAI  
LLKEWQPDVMYLSTTDYIQHKFAPEQPEAKAFYEMFDKYLTELDMGAAI  
LLKEWDPDVMYLSTTDYVQHKYAPDDAQAQAKSFYEMFDKYLTELDMGAAI  
IVKKQKLDLIYLSTTDYIQHKCAPGSKMANDFYHMIDGYLQKLYDQGCIE  
LLKEWSPDVMYLSTTDYVQHKYAPDDAQAQAKSFYEMFDKYLTELDMGAAI  
LLEQKKADLFYLSLSDMVQHSAGPGEELADQFNRDVDRVGRMLMELGAVV  
LLETTRPLDILYLSLSDLVQHKHAPDAPEAHEFMKDVDRLARLIDLGATI  
LMETARPLIYLSTSDYVQHKYKPGDAESNAFHAAVDSRMARLIELGATV  
LHERLSATLLYVSLTDDYVQHKYAPDQAQAKSFYEMFDALFGEYLDAMGAAI  
LAKTRRVELMYLATHDYVQRKWAPGSAQANTFYAADRHLAQLDALEWVV  
LLETAKPELIYLSTSDYVQHKYQPGEAESNDFHAAVDRRIARLIELGATV  
LLQERRADLFYLSLSDYIQHKHAPRSTESDEFMRKVDGYLGEYVVLGAVV  
LLQDRRPDLMYLSTTDYVQHKWAPPEEAQARHFYQRLDDARTTRLDLIVL  
LLEEGKSDFLYLSLSDYIQHKYPPGPEADEFMGAIDARLQKLASLAPIV  
ILEREKPDLMYLSTSDYIQHKYPPGSKANAYVGIIDALGRLLALGATV  
: . : \* : \* : \* : \*

AITADHGMNAKTDAIGR-PNIFLQDLDLDAQYG----AQTRVLLPITDP  
AITADHGMNAKTDAIGR-PNIFLQDLDLDAQYG----ARRTRVLLPITDP  
AITADHGMNAKTDAIGR-PNIFLQDLDLDAQYG----AQTRVLLPITDP  
ALTADHGMNAKTDAIGR-PNIVFLQDRLDLDAQYG----ARRTRVLLPITDP  
GVTADHGMNAKTDSLKG-ANILFLQQLVDERFG----TDTRVLLPITDP  
GVTADHGMNAKTDSLKG-ANILFLQQLVDERFG----ADATRVLLPITDP  
VLTADHGMNAKVALDG-TPDVIYQLQDFDAWLG----TAKARVILPITDP  
ALTADHGMNAKHGDK-GAPNVIYQLQDLDLHWFAG----TTRVLLPITDP  
VLTADHGMNDKHG-ATGEPNVIYQLQDLDLHWFAG----EGAARVILPITDP  
AITADHGMNAKHGDEGTGEPNVIYQLQELFDAWLG----HDAARVILPITDP  
GLTADHGMNAKHDPQTGEPNVIYQLQDVLDEWLG----TGRARVILPITDP  
AITADHGMNAKHGDEGTGEPNVIYQLQELFDEWLG----HDAARVILPITDP  
AITADHGMNAKHGDEGTGEPNVIYQLQELFDEWLG----EDAARVILPITDP  
AITADHGMNAKHGDDATGEPNVIYQLQELFDEWLG----HDAARVILPITDP  
GLTADHGMNAKHDPQTGEPNVIYQLQDVLDEWLG----ARRARVILPITDP  
ALTADHGMNAKHDDATKAPNVIYQLQDLDAWLGRGVEDGGARVILPITDP  
GLTADHGMNAKHDPQTGEPNVIYQLQDVLDEWLG----ARAARVILPITDP  
GLTADHGMNAKHDPQTGEPNVIYQLQDVLDDWLG----HGRARVILPITDP  
AITADHGMNAKHGDEGTGEPNVIYQLQELFDEWLG----HDAARVILPITDP  
ALTADHGMNAKHGDEATKAPNVIYQLQDLDAWLGRGVEAGGARVILPITDP  
GVTADHGMNAKHDPRTGEP- NVYQLQDALDAWLG----PRRARVILPITDP  
GVTADHGMNAKHDPRTGEPNVVYQLQDALDAWLG----PRLARVILPITDP  
GVTADHGMNAKHDPRTGEPNVVYQLQDALDAWLG----PRLARVILPITDP  
GLTADHGMNAKHGDEATGEPNVIYQLQDFAFDRWFG----Q SARVILPITDP  
GVTADHGMNAKHDPATGRPNVYQLQDALDGWFG----ARAARVILPITDP  
VVTADHGMKPKHKADGS-PDVIYVQDLDLDEWLG----KDAARVILPITDP  
VVTADHGMKPKHKADGS-PDVIYVQDLDLDEWLG----EAAARVILPITDP  
VVTADHGMKPKHKADGS-PDVVYVQDLDLDEWLG----KDAARVILPITDP  
VVTADHGMKPKHHADGS-PNVVYQLDYLDLDES LG----AGKARVILPITDP  
ACIADHGM SHKTDAQGR-PNAIFLQDLDLLEAFRG----AGSARVILPITDP  
VVTADHGMKPKHDASGD-PQVIYVQDLDLDEWLG----EAAARVILPITDP  
VVTADHGMKPKHSDGS-PNVIYVQSLLEWLG----AGEARVILPITDP

tr|B1PM60|B1PM60\_9PROT  
tr|D0RQ73|D0RQ73\_9RICK  
tr|B1A0M6|B1A0M6\_9BACT  
tr|B6JE67|B6JE67\_OLICO  
tr|B9K3S9|B9K3S9\_AGRVS  
tr|Q215P4|Q215P4\_RHOPB  
tr|A9G6L6|A9G6L6\_SORC5  
tr|C5AM01|C5AM01\_BURGB  
tr|B3QHC0|B3QHC0\_RHOPT  
tr|Q0CWK4|Q0CWK4\_ASPTN  
tr|C1DSK8|C1DSK8\_AZOVD  
tr|B8MDJ2|B8MDJ2\_TALSN  
tr|Q01YC7|Q01YC7\_SOLUE

VVTADHGMKPKHDANGD--PAVIYVQDILLDDWLG----EAAARVILPITDP  
CFTADHGMKPKGTNEDGS--LNLIIYLQDELDDKKFG----KDFCNVICITIDP  
VVTADHGMKPKHDANGD--PAVIYVQDILLDEWLG----EAAARVILPITDP  
GIVADHGMTDKCDTPDGE--PQVVFLEKMLNEQFG----PGSVRVICITIDP  
GIVADHGMNDLSRADGT--PNVVYLGDIILDEEFG----EGSTRVICITIDP  
ALTADHGMADKTDADGR--PNVVYLEDALNDKFG----AGSTARVICIADP  
GITADHGMNDKTAQDGS--PNVRYLDDALREAGLSG----FRVLLPITDP  
AVTADHGTGAKHDPRTGAPKVVYLDALDAWLDFP----RTRVVLPIADP  
ALTADHGMADKSDADGR--PNVVYLEDALNQTFG----AGVARVICIADP  
AVTGDHGMSDKSDANGK--PNVLFLEDFLNHKWP----QSGARVICIADP  
GLTADHGMSDKSDAAGE--PNVIWLQDILDAEFG----AGETTIVICITIDA  
GVTGDHGMRSRKSADGE--PNVLFLEDKLHEKFG----ARSARVICITIDP  
ALTADHGMNDKSNADGS--PNIVFLQDILLDMQFG----SGTAKVILPITDP  
.\*\*\* :. : : :. :.\*.\*.

tr|Q51782|Q51782\_PSEFL  
tr|Q50HR5|Q50HR5\_9PSED  
tr|Q50HR6|Q50HR6\_PSEPU  
tr|B1GB52|B1GB52\_9BURK  
tr|B3R8G0|B3R8G0\_CUPTR  
tr|Q0K2Z6|Q0K2Z6\_RALEH  
tr|Q122G7|Q122G7\_POLSJ  
tr|A1GW5|A1GW5\_VEREI  
tr|Q46NR5|Q46NR5\_RALEJ  
tr|B1FA18|B1FA18\_9BURK  
tr|Q13P91|Q13P91\_BURXL  
tr|B9BDA8|B9BDA8\_9BURK  
tr|Q39BS9|Q39BS9\_BURS3  
tr|B1K0L1|B1K0L1\_BURCC  
tr|B1GBC6|B1GBC6\_9BURK  
tr|Q0JZU4|Q0JZU4\_RALEH  
tr|B2JLS9|B2JLS9\_BURP8  
tr|B2TDW9|B2TDW9\_BURPP  
tr|A9AC80|A9AC80\_BURM1  
tr|B3RBG9|B3RBG9\_CUPTR  
tr|Q2T3L1|Q2T3L1\_BURTA  
tr|Q63NF1|Q63NF1\_BURPS  
tr|Q62CM0|Q62CM0\_BURMA  
tr|A4JJS8|A4JJS8\_BURVG  
tr|B9BUA1|B9BUA1\_9BURK  
tr|Q92UV8|Q92UV8\_RHIME  
tr|A6UJ29|A6UJ29\_SINMW  
tr|C8SFV8|C8SFV8\_9RHIZ  
tr|B6B654|B6B654\_9RHOB  
tr|Q7WNM7|Q7WNM7\_BORBR  
tr|C7D6N1|C7D6N1\_9RHOB  
tr|A3SHW2|A3SHW2\_9RHOB  
tr|B1PM60|B1PM60\_9PROT  
tr|D0RQ73|D0RQ73\_9RICK  
tr|B1A0M6|B1A0M6\_9BACT  
tr|B6JE67|B6JE67\_OLICO  
tr|B9K3S9|B9K3S9\_AGRVS  
tr|Q215P4|Q215P4\_RHOPB  
tr|A9G6L6|A9G6L6\_SORC5  
tr|C5AM01|C5AM01\_BURGB  
tr|B3QHC0|B3QHC0\_RHOPT  
tr|Q0CWK4|Q0CWK4\_ASPTN  
tr|C1DSK8|C1DSK8\_AZOVD  
tr|B8MDJ2|B8MDJ2\_TALSN  
tr|Q01YC7|Q01YC7\_SOLUE

YVVHHGALGSYATVYLRLDAVPQ--RDAIDFLAGIAGVEAVLTRSQCQR  
YVVHHGALGSYATVYLRLDAVPQ--RDAIDFLAGIAGVEAVLTRSQCQR  
YVVHHGALGSYATVYLRLDAVPQ--RDAIDFLAGIAGVEAVLTRSQCQR  
YVVHHGALGSYATVYLRLDHEQQRDVAFLAAINGVEAVLTRAQASERF  
YVAHHGALGSYATVYLPAGTDQ--RAVHEAIAALPGIELVLDKRAASERF  
YVAHHGALGSYATVYLPAGTNQ--QAVHEAIAALPGIELVLDKRAASERF  
YVMHHGALGSFATVYLPDGV--VAAACERLAQLKGMVVLTREQAARRF  
YVVHHGALGSYATIHLPADLD--VREL IARLSALAGVEVLDRAAAAAARF  
YVVHHGALGSFATVYTPDAES--AARWISRIADIDGMESVLDTRQEAERF  
YVVHHGALGSFATVYVPDSGE--IDALRARLAAVDGIIEVLTGAEGCARF  
YVVHHGALGSFATIYLPDVS--AQVIERIGGLRGIETVLDNSAACERF  
YVVHHGALGSFATVYVPASAD--IDALRARLAAVDGIIEVLTGAEGCARF  
YVVHHGALGSFATVYVPATAD--AEALRARLAAVDGIIEVLTGAEGCARF  
YVVHHGALGSFATVYVPDAD--TDALRARLAAVDGIIEVLTGAEGCARF  
YVVHHGALGSFATIYLPDVS--AQVIERIRGLAGVELALDNRAACERF  
YVVHHGALGSYATIYLPDAD--PAIKARLSDLQGVESVLTNAEACARF  
YVVHHGALGSFATIYLLADVNA--RQVIERLGLKDIIEVLDNKAACKRF  
YVVHHGALGSFATIYLPDVS--AQVIERIGGLQIDIVLDNAAACERF  
YVVHHGALGSFATVYVPASAD--VDALRARLGAVDGIELVLSGAEGCARF  
YVVHHGALGSYATIYLPDAD--AAAIQARLSDLQGVESVLTNADACARF  
YVVHHGALGSFATIYVEEVD--AAVIGRLSAIDGIELVLDNKAACKRF  
YVVHHGALGSFATIYVEQVDA--GTVIGRLREFDGVLELALDNATAAERF  
YVVHHGALGSFATIYVEQVDA--GTVIGRLREFDGVLELALDNATAAERF  
YVVHHGALGSFATVYLPAGVDR--TDMWRIGDLGIELVLDNAAEAARF  
YVVHHGALGSFATVYLPAINR--TDMWRVGLDGVLELALDNAAEAARF  
YVVHHGALGSFATAYLPDGC--SEIMARLKAIQGVVLDGREEACRRF  
YVVHHGALGSFATAYLPQCDR--GEIDRLKALDGIIEVLDREEACRRF  
YVVHHGALGSFATAYLPDGDQ--AGIMARLAKVDGIMLVDSPTACKRF  
YVVHHGALGSFATVYLPDGVIM--SEIPQIEALDGIIEVLDNKAACKRF  
FVRHHGALGSFVRGYARNP--ADIEAMMQAAAAIDGVQEVLSREQAQRL  
YVVHHGALGGFGTAYLPDGANR--ADIIARLASREEILEVLTKEEAVERF  
YVVHHGALGSFATAYLPDGC--GAIERLAAREELILVVDKAEAMRRF  
YVVHHGALGGFGTAYLPDGTDR--ADIIARLAAREELLEVTKEEAVERF  
YVVHHGSGFSFVTIYLEDKNI--SEVVKYIKTIKIDIVLSNDESVKKF  
YVVHHGALGGFGTAYLPDGTDR--GDIARLAAREELLEVTKEEAVERF  
FVKHHGALGSFVRVYATGK--TS--PETLMDAAARIPGVALVDGKSASERY  
FVKHHGALGGFVRVHLMKDGDL--RNEILKAIARTLPGVEALTDGQAQF  
FVRHHGALGGFVRVHLLKP--CD--IKAMMTYARSLPGVELVLDRAATVCERY  
YVVHHGALGSYATVYLPDGD--ARAAQVLRGLPGVELVLDAREEAARRF  
HVAHHGALGSFATIHLPDGLDA--SEVVMLLRRLDGIALLALAREEAACF  
FVRHHGALGGFVRVHLLKP--CD--IAAMMTFVRSPLPGVELVLDRAATVCERY  
FVKHHGALGGFVRVHLLKDC--SD--VEDMVAACRELPVELAMLGEEAAMF  
FVAHHGALGGFVRVWVRGNVSV--AAIERIAALEGVDLSLKDATACRFL  
FVRHHGALGSFVRVYKDL--TT--LGSTLAYCKSLPEIEVAITGKEAAEY  
YVHHGALGSYATIFFQQPVSA--PAVMSLLNRQPGVELVMDRAAAAKLF  
. \* \* \* \* : \* . :

tr|Q51782|Q51782\_PSEFL  
tr|Q50HR5|Q50HR5\_9PSED  
tr|Q50HR6|Q50HR6\_PSEPU  
tr|B1GB52|B1GB52\_9BURK  
tr|B3R8G0|B3R8G0\_CUPTR  
tr|Q0K2Z6|Q0K2Z6\_RALEH  
tr|Q122G7|Q122G7\_POLSJ  
tr|A1GW5|A1GW5\_VEREI  
tr|Q46NR5|Q46NR5\_RALEJ  
tr|B1FA18|B1FA18\_9BURK  
tr|Q13P91|Q13P91\_BURXL  
tr|B9BDA8|B9BDA8\_9BURK  
tr|Q39BS9|Q39BS9\_BURS3  
tr|B1K0L1|B1K0L1\_BURCC

ELPEDRIGDLVVLGERLTVLGSAAKHDLSGLTVP--LRSHGGVSEQKVPL  
ELPEDRIGDLVVLGERLTVLGSAAKHDLSGLTVP--LRSHGGVSEQKVPL  
ELPEDRIGDLVVLGERLTVLGSAAKHDLSGLTVP--LRSHGGVSEQKVPL  
ELPPDRIGDLVVSERLTVLGGTPARHDLSGLDAP--LRSHGGLSEQKVPL  
ELPPDRIGDLVVSERLTVLGGTPARHDLSGLDAP--LRSHGGLSEQKVPL  
ELPADRIGDLVAVSERFTVIGTSASRHDLSDALEVP--LRSHGGLSEQRVPL  
ELPPDRIGDIVVSQRDVLGTAARHDLSGLDAP--LRSHGGLSEQQVPL  
GLPPDRIGDIVAVSRQNVVIGTSSRHDLSGLDAP--LRSHGGVSEQVPL  
ELPPDRIGDLVIVISKQDVVLGTRRIKHDLSDGLDVP--LRSHGGVSEQIVPL  
ELPNDRVGDIVVSTKHVALGTRRNEHDLSGLTVP--LRSHGGVSEQEVPL  
ELPPDRMGDLVIVISKQDVVLGTRRIKHDLSDGLDVP--LRSHGGLSEQIVPL  
ELPPARMGDLVIVISKQDVVLGTRRIKHDLSDGLDVP--LRSHGGVSEQIVPL  
ELPPARMGDLVIVISKQDVVLGTRRIKHDLSDGLDVP--LRSHGGVSEQIVPL



tr|B1GBC6|B1GBC6\_9BURK  
tr|Q0JZU4|Q0JZU4\_RALEH  
tr|B2JLS9|B2JLS9\_BURP8  
tr|B2TDW9|B2TDW9\_BURPP  
tr|A9AC80|A9AC80\_BURM1  
tr|B3RBG9|B3RBG9\_CUPTR  
tr|Q2T3L1|Q2T3L1\_BURTA  
tr|Q63NF1|Q63NF1\_BURPS  
tr|Q62CM0|Q62CM0\_BURMA  
tr|A4JJS8|A4JJS8\_BURVG  
tr|B9BUA1|B9BUA1\_9BURK  
tr|Q92UV8|Q92UV8\_RHIME  
tr|A6UJ29|A6UJ29\_SINMW  
tr|C8SFV8|C8SFV8\_9RHIZ  
tr|B6B654|B6B654\_9RHOB  
tr|Q7WNM7|Q7WNM7\_BORBR  
tr|C7D6N1|C7D6N1\_9RHOB  
tr|A3SHW2|A3SHW2\_9RHOB  
tr|B1PM60|B1PM60\_9PROT  
tr|D0RQ73|D0RQ73\_9RICK  
tr|B1A0M6|B1A0M6\_9BACT  
tr|B6JE67|B6JE67\_OLICO  
tr|B9K3S9|B9K3S9\_AGRVS  
tr|Q215P4|Q215P4\_RHOPB  
tr|A9G6L6|A9G6L6\_SORC5  
tr|C5AM01|C5AM01\_BURGB  
tr|B3QHC0|B3QHC0\_RHOPT  
tr|Q0CWK4|Q0CWK4\_ASPTN  
tr|C1DSK8|C1DSK8\_AZOVD  
tr|B8MDJ2|B8MDJ2\_TALSN  
tr|Q01YC7|Q01YC7\_SOLUE

ELPKDRVGDIVVIGTKHVVLGTRCDEHDL SGLTVP-LRSHGGLSEQEVPL  
ELPPDRVGDIVVTSKXHVVLGTSRSHRDL SGLDAP-LRSHGGVSEQVPL  
ELPNDRVGDIVVSRKDTALGTRREEHDL SGLTVP-LRSHGGIAEQVPL  
ELPNDRVGDIVVSTKXHVVLGTRRAEHDL SGLTVP-LRSHGGISEQVPL  
ELPPDRMGDLIVISKQDVVLGTRRIKHDL SGLDVP-LRSHGGLSEQIVPL  
ELPSDRVGDIVVTSKXHVVLGTSQSRHDL SGLDAP-LRSHGGVSEQVPL  
ELPADRIGDVAVGRRDVALGTRESEHDL SGLTVP-LRSHGGLSEQRVPL  
ELPADRIGDVVVVGRRDVVLGTRAREHDL SGLTVP-LRSHGGLSEQRVPL  
ELPADRIGDVLVVARRDTAVGTREHDL SGLTVP-LRSHGGVSEQEVPL  
SLPADRIGDLVVIARRDTTLGTRERHDL SGLTVP-LRSHGGVSEQEVPL  
ELPEDRIGDIVLVSSENKTLGTSEHRHDLAALDEP-LRSHGGLTEQEVPP  
ELPEDRIGDIVLVSSENKTLGTSEHRHDLAALNEP-LRSHGGLTEQEVPP  
ELPADRIGDIVLVSTENKTLGTSEHRHDLAALKEP-LRSHGGLTEQEVPP  
GLPLDREADIVVISHESYVLGSRADHDLSTVGDHPLRSHGGSEQVPP  
ELPADRIGDIVMISTENLTLGTSEHLHDLAALNEP-LRSHGGLTEQEVPP  
DLPGDRI GDIVMISGENICIGTSEERHDLAALKEP-LRSHGGLTEQEVPP  
ELPADRIGDIVMISTENMTIGTSESRHDLAALNEP-LRSHGGLTEQEVPP  
NQPDRIGDIVVTSDENFAIGKESDHDLTKLKEP-LRTHGGMGESDIP  
ELPADRIGDIVMISTENMTIGTSESRHDLAALNEP-LRSHGGLTEQVPP  
EMPIEREGDIFAIGDITYAIGSRPDEHDL SGLNGHKLRSHGGLSEQVPP  
EFPLDREADIVVISCGRVALGARNIDHDI SQLAGERLRSHGSLAEQQVPP  
QLPPDRIGDFAVSDRGTVVGARREDHDL SALGSHSLRSHGGLSEQVPP  
ALPPDRIGDLVILGDRSTVLGKSAAYHDL SAVQRG-LRSHGGLHEAEVPI  
ELPVDRI GDVVVVARDDTVLGRREHDL SAL TAP-LRSARVRRAGGAA  
QLPPDREGDFAVFTDRGTAVGARREDHDL SALGDHRLRSHGGLGEQVPP  
DMPADREGDLVVISKEQFAIGSRADHDL TQLQGHRLRTHGGLSERAIPL  
DLPEDREADVAVIARKDVCIGSSARLHDL SGLKGHRLRTHGGLTETRVPP  
NMPLDREGDIVVSKPEAVIGTRKSEHDL SKVRDYTLRSHGGLSEQDIP  
DLPADR-----IGT  
\* \*

tr|Q51782|Q51782\_PSEFL  
tr|Q50HR5|Q50HR5\_9PSED  
tr|Q50HR6|Q50HR6\_PSEPU  
tr|B1GB52|B1GB52\_9BURK  
tr|B3R8G0|B3R8G0\_CUPTR  
tr|Q0K2Z6|Q0K2Z6\_RALEH  
tr|Q122G7|Q122G7\_POLSJ  
tr|A1GW5|A1GW5\_VEREI  
tr|Q46NR5|Q46NR5\_RALEJ  
tr|B1FA18|B1FA18\_9BURK  
tr|Q13P91|Q13P91\_BURXL  
tr|B9BDA8|B9BDA8\_9BURK  
tr|Q39BS9|Q39BS9\_BURS3  
tr|B1K0L1|B1K0L1\_BURCC  
tr|B1GBC6|B1GBC6\_9BURK  
tr|Q0JZU4|Q0JZU4\_RALEH  
tr|B2JLS9|B2JLS9\_BURP8  
tr|B2TDW9|B2TDW9\_BURPP  
tr|A9AC80|A9AC80\_BURM1  
tr|B3RBG9|B3RBG9\_CUPTR  
tr|Q2T3L1|Q2T3L1\_BURTA  
tr|Q63NF1|Q63NF1\_BURPS  
tr|Q62CM0|Q62CM0\_BURMA  
tr|A4JJS8|A4JJS8\_BURVG  
tr|B9BUA1|B9BUA1\_9BURK  
tr|Q92UV8|Q92UV8\_RHIME  
tr|A6UJ29|A6UJ29\_SINMW  
tr|C8SFV8|C8SFV8\_9RHIZ  
tr|B6B654|B6B654\_9RHOB  
tr|Q7WNM7|Q7WNM7\_BORBR  
tr|C7D6N1|C7D6N1\_9RHOB  
tr|A3SHW2|A3SHW2\_9RHOB  
tr|B1PM60|B1PM60\_9PROT  
tr|D0RQ73|D0RQ73\_9RICK  
tr|B1A0M6|B1A0M6\_9BACT  
tr|B6JE67|B6JE67\_OLICO  
tr|B9K3S9|B9K3S9\_AGRVS  
tr|Q215P4|Q215P4\_RHOPB  
tr|A9G6L6|A9G6L6\_SORC5  
tr|C5AM01|C5AM01\_BURGB  
tr|B3QHC0|B3QHC0\_RHOPT  
tr|Q0CWK4|Q0CWK4\_ASPTN  
tr|C1DSK8|C1DSK8\_AZOVD

IFNRKLVGLD-----SPGR-LRNF DIIDLALNHLA--  
IFNRKLVGLD-----SFDR-LRNF DIIDLALNHLA--  
IFNRKLVGLD-----SFDR-LRNF DIIDLALNHLA--  
IFNRKLSGND-----GTRR-LRNF DVIDLALNHLV--  
LFNRKVS VPA-----G-QR-LRNF DI LRLALNHAD--  
LFNRKV TAPA-----G-QR-LRNF DI LRLALNHAD--  
IVNRKLPGLD-----RAR-RFRNF DAFDVALNRYAQG-  
ILNRRVEG-V-----ASERRLRNF DAFDVALNHAVAL  
LCNRSMVGLQ-----P-DRRLRNF DALDLALNHAA--  
IFS KPVATAV-----TGRARLRNF DI IDIALNHLQ--  
LFNRRV EALPSS-----GGNGRRRLRNF DI IDIALNRSAS  
IFNQPV SADV-----AGRARLRNF DI IDIALNHLR--  
IFS KPVAGDV-----SGRARLRNF DI IDIALNHLQ--  
IFS KPVATDV-----TGRARLRNF DI IDIALNHLQ--  
LFNRRV EPLTA-----D--SGRRRLRNF DIFDVALNRYAS  
VFNR-ATAGI-----PGKALLRNF DIFDVALNHLH--  
IFNRRIDEAR-----VAGKRLRNF DVFEI ALNHVATS  
LFNRRV EALPSS-----GGESGKRLRNF DIFDIALNRVSSS  
IFS QPV SADV-----AGRARLRNF DI IDIALNHLR--  
VFNR-ATGGI-----PGKAVLRNF DIFDVALNHLH--  
LFNRRIEGV-----EPGRRLRNF DLFDLALNRAVR-  
LFNRRIEHV-----EPGRRLRNF DLFDLALNRTVQ-  
LFNRRIEHV-----EPGRRLRNF DLFDLALNRTVQ-  
IFNRRIEPR-----DPARRPRNF DVDFV LNR IAS-  
LFNRRIVRR-----DVERRPRNF DVDFV LNR VAR-  
IVNRVLP ELPNA-----PRLRNF DAFF YAVTAAAEA  
IVNRVLP DPGA-----PCLRNF DAFF YAVAAAALI  
IVNRVLP DLPDE-----PTLRNF DAFF YATMAAALA  
IVNRVLDLPEQP-----EALRNF DAFF YACTAAAL-  
FLSQPLSPAYRER-----AAQGGLRNF DIFDVALNGVQTQ  
IVNRIDLP SKP-----VLRNF DAFF YAAAAAAL-  
IVNRVLDLDPQP-----EQLRNF DAFF YATMAAAQ-  
IVNRVIDLP SKP-----VLRNF DAFF YATTAAL-  
FLSKIDQSYKSK-----GVLRNF DIFDLALNYG--  
IVNRVIDLP SKP-----VLRNF DALFYAITAAAL-  
MVSKPLNKEYQAI-----VAARRLRNF DIFDVALNGPA--  
IISHPLN-ETYAK-----RSIANLRNF DVFDYALNGTL--  
VVSRLPTRDYRER-----AAAGVLRNYDIFDVALNGVE-  
LASHPLRPERAWLLGAEAAEADADAARGRPSALSADVDFDLVNLSTA  
AVQPAPRGDGRCPA--LAQFRIRIRAEP SGARRRFRVRAHAAHAGAGD  
VLSRPLKRDYRER-----AATGVLNRNYDIFDVALNGVD--  
LRSTPVQMDVQG-----RQWRNF DVFDLALNY----  
ILNRLNSEYRQ-----VAHSEIKSYRIFEFAINGTL--
